# Supplementary material for: Young people’s perspectives on patient-reported outcome measures in inflammatory arthritis: results of a multicentre European qualitative study from a EULAR task force
Source: HighWire-hosted journal article supplement (doi:10.1136/rmdopen-2020-001517), 2021-01-01
Supplement: rmdopen-2020-001517supp002_data_supplement.pdf [file rmdopen-2020-001517supp002_data_supplement.pdf]

**Supplementary table 2. COREQ (COnsolidated criteria for REporting Qualitative research) Checklist**

| Topic                                          | Item no. | Guide Questions/'Description                                                                                                                             | Reported in section                                                                                                                                                                                                                                                                                                                          |
|------------------------------------------------|----------|----------------------------------------------------------------------------------------------------------------------------------------------------------|----------------------------------------------------------------------------------------------------------------------------------------------------------------------------------------------------------------------------------------------------------------------------------------------------------------------------------------------|
| <b>Domain 1: Research team and reflexivity</b> |          |                                                                                                                                                          |                                                                                                                                                                                                                                                                                                                                              |
| <b>Personal characteristics</b>                |          |                                                                                                                                                          |                                                                                                                                                                                                                                                                                                                                              |
| Interviewer/facilitator                        | 1        | Which author/s conducted the interview or focus group?                                                                                                   | The interviews were conducted by AA (female, MD, PhD, background in rheumatology), EM (female, MSc, background in occupational health and health science), IP (male, MD, PhD, background in rheumatology) and WO (female, MSc, patient research partner), HCPs with experience in qualitative research data acquisition.                     |
| Credentials                                    | 2        | What were the researcher's credentials? E.g. PhD, MD                                                                                                     |                                                                                                                                                                                                                                                                                                                                              |
| Occupation                                     | 3        | What was their occupation at the time of the study?                                                                                                      |                                                                                                                                                                                                                                                                                                                                              |
| Gender                                         | 4        | Was the researcher male or female?                                                                                                                       |                                                                                                                                                                                                                                                                                                                                              |
| Experience and training                        | 5        | What experience or training did the researcher have?                                                                                                     |                                                                                                                                                                                                                                                                                                                                              |
| <b>Relationship with participants</b>          |          |                                                                                                                                                          |                                                                                                                                                                                                                                                                                                                                              |
| Relationship established                       | 6        | Was a relationship established prior to study commencement?                                                                                              | As the study participants were approached from the rheumatology centres; the interviewers might have known some of the participants from previous visits.                                                                                                                                                                                    |
| Participant knowledge of the interviewer       | 7        | What did the participants know about the researcher? e.g. personal goals, reasons for doing the research                                                 | The researchers introduced themselves and informed the participants comprehensively about the goals and the content of the study. All participants gave oral and written consent to be included in this study. This is reported in the methods section. Reasons for undertaking the research on PROMs is reported in the background section. |
| Interviewer characteristics                    | 8        | What characteristics were reported about the interviewer/facilitator? e.g. Bias, assumptions, reasons and interests in the research topic                |                                                                                                                                                                                                                                                                                                                                              |
| <b>Domain 2: Study design</b>                  |          |                                                                                                                                                          |                                                                                                                                                                                                                                                                                                                                              |
| <b>Theoretical framework</b>                   |          |                                                                                                                                                          |                                                                                                                                                                                                                                                                                                                                              |
| Methodological orientation and theory          | 9        | What methodological orientation was stated to underpin the study? e.g. grounded theory, discourse analysis, ethnography, phenomenology, content analysis | We undertook a qualitative study using thematic analysis for analysing the qualitative interview data. This is reported in the methods section.                                                                                                                                                                                              |
| <b>Participant selection</b>                   |          |                                                                                                                                                          |                                                                                                                                                                                                                                                                                                                                              |
| Sampling                                       | 10       | How were participants selected? e.g. purposive, convenience, consecutive, snowball                                                                       | We included individuals who agreed to participate in this study. The selection criteria and are reported in the methods section.                                                                                                                                                                                                             |
| Method of approach                             | 11       | How were participants approached? e.g. face-to-face, telephone, mail, email                                                                              | All participants were contacted by phone. Those wishing to participate were asked for a suitable time for conducting the interview, which took place at the participating centre. This is reported in the methods section.                                                                                                                   |
| Sample size                                    | 12       | How many participants were in the study?                                                                                                                 | Information about the sample and sample size is provided in the results section and in table 2. All individuals that were willing to participate in the focus group study finished the interviews.                                                                                                                                           |
| Non-participation                              | 13       | How many people refused to participate or dropped out? Reasons?                                                                                          |                                                                                                                                                                                                                                                                                                                                              |

| Topic                                  | Item no. | Guide Questions/Description                                                       | Reported in section                                                                                                                                                                                                                                                                                                                                                        |
|----------------------------------------|----------|-----------------------------------------------------------------------------------|----------------------------------------------------------------------------------------------------------------------------------------------------------------------------------------------------------------------------------------------------------------------------------------------------------------------------------------------------------------------------|
| <b>Setting</b>                         |          |                                                                                   |                                                                                                                                                                                                                                                                                                                                                                            |
| Setting of data collection             | 14       | Where was the data collected? e.g. home, clinic, workplace                        | The interviews were conducted as focus-group interviews at the rheumatology centres of the participating countries.                                                                                                                                                                                                                                                        |
| Presence of non-participants           | 15       | Was anyone else present besides the participants and researchers?                 |                                                                                                                                                                                                                                                                                                                                                                            |
| Description of sample                  | 16       | What are the important characteristics of the sample? e.g. demographic data, date | The baseline characteristics of the sample are reported in table 1.                                                                                                                                                                                                                                                                                                        |
| <b>Data collection</b>                 |          |                                                                                   |                                                                                                                                                                                                                                                                                                                                                                            |
| Interview guide                        | 17       | Were questions, prompts, guides provided by the authors? Was it pilot tested?     | As reported in the methods section, the interview guide was developed and adapted together with HCPs and PRPs. The questions were pretested in young people with arthritis before conducting the focus groups, and were adapted according to their feedback <sup>16</sup> . The interview questions are depicted in supplemental table 1.                                  |
| Repeat interviews                      | 18       | Were repeat interviews carried out? If yes, how many?                             | The focus group interviews were not repeated. This is reported in the methods section.                                                                                                                                                                                                                                                                                     |
| Audio/visual recording                 | 19       | Did the research use audio or visual recording to collect the data?               | Interviews were all audiotaped and transcribed verbatim and debriefing notes were taken after each interview. This is reported in the methods section.                                                                                                                                                                                                                     |
| Field notes                            | 20       | Were field notes made during and/or after the interview or focus group?           |                                                                                                                                                                                                                                                                                                                                                                            |
| Duration                               | 21       | What was the duration of the interviews or focus group?                           | The duration of the focus group interviews were 92 minutes on average.                                                                                                                                                                                                                                                                                                     |
| Data saturation                        | 22       | Was data saturation discussed?                                                    | In this study, data saturation was defined as no new qualitative codes coming up in at least three subsequent focus groups. This was reported in the methods section and the results section.                                                                                                                                                                              |
| Transcripts returned                   | 23       | Were transcripts returned to participants for comment and/or correction?          | According to our opinion and previous negative experiences (lay study participants were concerned about their mode of expression when reviewing their transcripts), we decided not to return the transcripts to the participants for comments and/or corrections. Instead, six PRPs (IB, MK, NC, SS, TW, WO) reviewed the data analysis (reported in the methods section). |
| <b>Domain 3: analysis and findings</b> |          |                                                                                   |                                                                                                                                                                                                                                                                                                                                                                            |
| <b>Data analysis</b>                   |          |                                                                                   |                                                                                                                                                                                                                                                                                                                                                                            |
| Number of data coders                  | 24       | How many data coders coded the data?                                              | The data coding and analysis was primarily done by EM, Vienna, Austria, with input from the local investigators from Croatia, Italy and the Netherlands and the taskforce (including PRPs). This is reported in the methods section.                                                                                                                                       |
| Description of the coding tree         | 25       | Did authors provide a description of the coding tree?                             | An example of a coding tree is provided in the methods section.                                                                                                                                                                                                                                                                                                            |
| Derivation of themes                   | 26       | Were themes identified in advance or derived from the data?                       | The identified themes were derived from the interview data. This inductive data analysis is described in detail in the methods section.                                                                                                                                                                                                                                    |

| Topic                        | Item no. | Guide Questions/'Description                                                                                                    | Reported in section                                                                                                                                                                                                                                                       |
|------------------------------|----------|---------------------------------------------------------------------------------------------------------------------------------|---------------------------------------------------------------------------------------------------------------------------------------------------------------------------------------------------------------------------------------------------------------------------|
| Software                     | 27       | What software, if applicable, was used to manage the data?                                                                      | The qualitative data analysis was facilitated by using Atlas ti data analysis software, which is described in the methods section.                                                                                                                                        |
| Participant checking         | 28       | Did participants provide feedback on the findings?                                                                              | Several PRPs (IB, MK, NC, SS, TW, WO) provided feedback on the findings (reported in the methods section).                                                                                                                                                                |
| <b>Reporting</b>             |          |                                                                                                                                 |                                                                                                                                                                                                                                                                           |
| Quotations presented         | 29       | Were participant quotations presented to illustrate the themes/findings? Was each quotation identified? e.g. participant number | Quotations are presented in the results section and in table 3. Each quotation was indexed using participant number, sex, age and information about the disease, eg:<br><br><i>I am just putting my line anywhere and think – that's fine. (female, 27, PsA, Austria)</i> |
| Data and findings consistent | 30       | Was there consistency between the data presented and the findings?                                                              | We endeavoured to ensure consistency between the data presented and the findings by using quotes to support our interpretations/findings. Please see the results section and table 3.                                                                                     |
| Clarity of major themes      | 31       | Were major themes clearly presented in the findings?                                                                            | We described our findings including original quotes from the participants in the results section and within table 3.                                                                                                                                                      |
