# Supplementary material for: Young people’s perspectives on patient-reported outcome measures in inflammatory arthritis: results of a multicentre European qualitative study from a EULAR task force
Source: HighWire-hosted journal article supplement (doi:10.1136/rmdopen-2020-001517), 2021-01-01
Supplement: rmdopen-2020-001517supp003_data_supplement.pdf [file rmdopen-2020-001517supp003_data_supplement.pdf]

**Supplementary table 3.** Overview about similarities and differences of concepts on a focus group level; the last row shows that no ‘new’ lower-level concepts came up in the last three subsequent focus groups (columns marked in grey), indicating that thematic saturation was reached.

| Higher-level concept                                                                        | Lower-level concept                                                             | Lower-level concept addressed in the respective focus group |           |           |          |           |           |          |           |           |          |           |           |   |
|---------------------------------------------------------------------------------------------|---------------------------------------------------------------------------------|-------------------------------------------------------------|-----------|-----------|----------|-----------|-----------|----------|-----------|-----------|----------|-----------|-----------|---|
|                                                                                             |                                                                                 | RA<br>AT                                                    | PsA<br>AT | SpA<br>AT | RA<br>HR | PsA<br>HR | SpA<br>HR | RA<br>NL | PsA<br>NL | SpA<br>NL | RA<br>IT | PsA<br>IT | SpA<br>IT |   |
| 6                                                                                           | 48                                                                              |                                                             |           |           |          |           |           |          |           |           |          |           |           |   |
| 1. Information, transparency and clarity regarding the purpose of PROMs are often missing   | Reasons for using PROMs are often not known                                     |                                                             |           | new       | +        |           |           |          | +         | +         | +        | +         | +         | + |
|                                                                                             | Need for definition/explanation of terms                                        | new                                                         | +         | +         | +        | +         | +         | +        | +         | +         | +        | +         | +         | + |
|                                                                                             | Uncertainty what to tick                                                        |                                                             | new       | +         | +        | +         | +         | +        | +         | +         |          |           |           | + |
|                                                                                             | Questions are incorrectly or not answered                                       |                                                             |           | new       |          |           |           |          |           |           |          |           |           | + |
|                                                                                             | Questions incite anxiety and/or fear                                            |                                                             |           |           |          |           |           |          |           | new       |          |           |           | + |
|                                                                                             | Feedback on PROM results is appreciated                                         | new                                                         | +         | +         |          | +         |           | +        | +         | +         |          |           | +         | + |
| 2. PROMs on daily functioning were seen as outdated                                         | Information about PROM results are available for members of the healthcare team |                                                             |           |           |          |           |           |          | new       |           | +        | +         |           |   |
|                                                                                             | PROMs not up-to-date                                                            | new                                                         |           |           | +        |           |           | +        | +         | +         | +        | +         |           |   |
|                                                                                             | Inappropriate questions for young people                                        | new                                                         | +         |           | +        |           |           | +        | +         | +         |          | +         | +         |   |
|                                                                                             | Items relevant to young people need to be added                                 | new                                                         | +         |           | +        | +         | +         | +        |           |           | +        |           | +         | + |
|                                                                                             | Questions (wording) need to be reformulated                                     | new                                                         |           |           |          |           |           |          | +         | +         | +        | +         | +         | + |
| 3. Relevant issues are often not sufficiently addressed when assessing PROs in young people | PROMs should be developed for different age groups                              |                                                             |           |           |          |           |           |          | new       |           |          |           |           |   |
|                                                                                             | Future plans for life                                                           |                                                             |           | new       |          | +         | +         | +        |           |           |          |           |           |   |
|                                                                                             | Education                                                                       |                                                             |           |           |          | new       | +         | +        | +         | +         |          |           |           |   |
|                                                                                             | Work and career goals                                                           |                                                             |           | new       |          |           | +         | +        |           |           |          |           |           |   |
|                                                                                             | Intimate relationships                                                          |                                                             | new       |           |          |           | +         |          |           |           |          | +         |           |   |
|                                                                                             | Sexuality                                                                       |                                                             | new       |           |          |           |           |          |           |           |          | +         |           |   |
|                                                                                             | Body image and appearance                                                       |                                                             | new       | +         |          |           |           |          |           |           |          |           |           |   |
|                                                                                             | Family planning                                                                 |                                                             |           | new       | +        |           | +         |          |           |           |          |           |           |   |
|                                                                                             | Self-management                                                                 |                                                             | new       |           |          |           |           |          |           | +         |          |           |           |   |
|                                                                                             | Use and outcomes of non-pharmacological treatments                              |                                                             | new       | +         | +        | +         | +         |          | +         |           |          |           |           | + |
|                                                                                             | Use of technological/assistive devices                                          | new                                                         |           |           | +        |           |           |          |           |           |          | +         |           |   |
|                                                                                             | Diet and food intake                                                            | new                                                         |           |           | +        |           |           |          |           | +         |          |           |           |   |
|                                                                                             | Psychosocial aspects of being chronically ill                                   |                                                             | new       | +         |          | +         | +         |          | +         |           | +        |           | +         | + |
| Social life, including hobbies and sports                                                   | new                                                                             | +                                                           |           | +         |          |           | +         | +        | +         | +         | +        | +         | +         |   |
| Mobility – commuting on public transport and driving                                        |                                                                                 | new                                                         |           | +         |          |           | +         |          |           |           |          |           |           |   |
| Changing/holding a certain position                                                         |                                                                                 |                                                             |           |           |          | new       | +         |          |           |           |          |           |           |   |

| Higher-level concept                                                                               | Lower-level concept                                                                                                                                            | LLC addressed in the respective focus group |            |           |           |           |           |           |           |           |           |           |           |
|----------------------------------------------------------------------------------------------------|----------------------------------------------------------------------------------------------------------------------------------------------------------------|---------------------------------------------|------------|-----------|-----------|-----------|-----------|-----------|-----------|-----------|-----------|-----------|-----------|
| 6                                                                                                  | 48                                                                                                                                                             | RA<br>AT                                    | PsA<br>AT  | SpA<br>AT | RA<br>HR  | PsA<br>HR | SpA<br>HR | RA<br>NL  | PsA<br>NL | SpA<br>NL | RA<br>IT  | PsA<br>IT | SpA<br>IT |
| 4. The scoring on a rating scale sometimes differs from the current health situation               | Scoring differently than the situation was experienced (on purpose to achieve something)                                                                       | new                                         |            | +         |           | +         | +         |           |           | +         |           |           | +         |
|                                                                                                    | Wish for getting in touch/being recognized                                                                                                                     |                                             | new        |           |           |           |           |           |           |           |           |           |           |
|                                                                                                    | Changes in disease management                                                                                                                                  | new                                         |            | +         |           |           |           |           |           |           |           |           |           |
|                                                                                                    | To show a flare in between visits (lack of continuous monitoring)                                                                                              |                                             | new        |           |           | +         |           |           |           |           |           |           |           |
| 5. The individual life situation of young people adds essential importance to the results of PROMs | PROMs should not only be used for data gathering, but as a mediator for discussions with HCPs                                                                  | new                                         |            | +         |           |           |           |           |           |           |           |           |           |
|                                                                                                    | <b>Individualization of outcome assessment would be appreciated</b>                                                                                            | new                                         | +          | +         |           | +         | +         | +         | +         | +         | +         | +         | +         |
|                                                                                                    | <b>Using comprehensive PROMs</b>                                                                                                                               |                                             | new        |           |           |           | +         | +         | +         |           | +         | +         | +         |
|                                                                                                    | <b>Using single scales only is insufficient</b>                                                                                                                | new                                         | +          | +         |           | +         | +         | +         | +         | +         | +         |           |           |
|                                                                                                    | Clear reference points are often missing (with and without medication, compared to someone without a disease or another patient in remission)                  |                                             | new        | +         |           | +         |           |           |           |           | +         |           |           |
|                                                                                                    | <b>Time frame is not adequate, e.g. a longer time frame for scoring pain to include flares</b>                                                                 | new                                         | +          | +         |           | +         | +         | +         | +         |           | +         | +         | +         |
|                                                                                                    | Substantial fluctuation of pain levels is difficult to score                                                                                                   |                                             |            |           |           |           |           |           |           | new       |           |           |           |
|                                                                                                    | <b>Forgetting the extent of pain over time</b>                                                                                                                 |                                             | new        | +         |           | +         |           |           |           | +         |           | +         |           |
|                                                                                                    | Interpreting results is difficult from the patients' perspective                                                                                               | new                                         | +          | +         |           | +         |           |           |           | +         |           |           |           |
|                                                                                                    | <b>Loosing important information (if PROs are quantified only, qualitative information, e.g. in a discussion with the healthcare professional, is missing)</b> | new                                         | +          |           |           | +         |           | +         | +         | +         |           | +         | +         |
|                                                                                                    | Missing overview about disease course (patient would appreciate an overview regarding their scores over time)                                                  | new                                         | +          |           |           | +         |           | +         | +         | +         |           |           |           |
| Patients prefer NRS to VAS                                                                         |                                                                                                                                                                | new                                         | +          | +         | +         | +         |           |           | +         | +         |           |           |           |
| <b>Patients were confronted with differently formulated PGA questions</b>                          | new                                                                                                                                                            | +                                           | +          |           | +         | +         | +         |           |           |           |           | +         |           |
| 6. The use of technology for data acquisition was suggested by some young people                   | New formats for collecting PROs are needed                                                                                                                     |                                             |            | new       |           |           |           | +         | +         | +         | +         |           |           |
|                                                                                                    | Continuous monitoring supports self-management                                                                                                                 |                                             | new        | +         |           | +         |           |           |           | +         |           |           |           |
|                                                                                                    | Use of a symptom diary/log could be facilitated by digital technologies                                                                                        |                                             | new        | +         |           | +         |           |           |           | +         |           |           |           |
|                                                                                                    | Time saving for patients and HCPs                                                                                                                              |                                             |            |           |           |           |           | new       |           |           |           |           |           |
| Number of LLCs addressed in a FG for the first time                                                |                                                                                                                                                                | <b>+19</b>                                  | <b>+16</b> | <b>+6</b> | <b>+0</b> | <b>+2</b> | <b>+0</b> | <b>+2</b> | <b>+2</b> | <b>+1</b> | <b>+0</b> | <b>+0</b> | <b>+0</b> |

Note. RA/AT = rheumatoid arthritis focus group (RA-FG) in Austria, including patients with JIA (juvenile idiopathic arthritis) and Still's disease; SpA/AT = spondyloarthritis focus group (SpA-FG) in Austria; PsA/AT = psoriatic arthritis focus group (PsA-FG) in Austria; RA/HR = RA-FG in Croatia, SpA/HR = SpA-FG in Croatia; PsA/HR = PsA-FG in Croatia; RA/NL = RA-FG in the Netherlands; SpA/NL = SpA-FG in the Netherlands; PsA/NL = PsA-FG in the Netherlands; RA/IT = RA-FG in Italy; SpA/IT = SpA-FG in Italy; PsA/IT = PsA-FG in Italy; lower level concepts (LLC) in bold were mentioned in all three disease areas and four countries; new = LLC addressed in a FG for the very first time, + = LLC which had already been addressed in a FG
